# Supplementary material for: Hydrology of inland tropical lowlands: the Kapuas and Mahakam wetlands
Source: Copernicus journal article supplement (doi:10.5194/hess-21-2579-2017), 2017-05-24
Supplement: Supplementary file [file hess-21-2579-2017-supplement-title-page.pdf › hess-21-2579-2017-supplement-title-page.pdf]

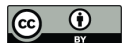

## *Supplement of*

# **Hydrology of inland tropical lowlands: the Kapuas and Mahakam wetlands**

**Hidayat Hidayat et al.**

*Correspondence to:* Hidayat Hidayat ([hidayat@limnologi.lipi.go.id](mailto:hidayat@limnologi.lipi.go.id))

- [hess-21-2579-2017-supplement-title-page.pdf](#)
- [SupplementHESS2016\\_388](#)
  - [Kapuas\\_Discharge\\_Sanggau.txt](#)
  - [Kapuas\\_GroundwaterLevel\\_Leboyan.txt](#)
  - [Kapuas\\_Rainfall\\_Leboyan.txt](#)
  - [Kapuas\\_SoilMoistureLeboyan.txt](#)
  - [Mahakam\\_Discharge\\_Melak.txt](#)
  - [Mahakam\\_GroundwaterLevel\\_Melintang.txt](#)
  - [Mahakam\\_Rainfall\\_Melintang.txt](#)

The copyright of individual parts of the supplement might differ from the CC-BY 3.0 licence.
